# Supplementary material for: Radiation-induced immunogenic modulation of tumor enhances antigen processing and calreticulin exposure, resulting in enhanced T-cell killing
Source: PubMed Central journal article supplement (PMC3964216; doi:10.18632/oncotarget.1719), 2013-12-31
Supplement: oncotarget-05-403-s002.pdf [file oncotarget-05-403-s002.pdf]

## Radiation-induced immunogenic modulation of tumor enhances antigen processing and calreticulin exposure, resulting in enhanced T-cell killing - Gameiro et al

|                              |               | % Positive (MFI) |             |                      |                     |
|------------------------------|---------------|------------------|-------------|----------------------|---------------------|
|                              |               | DMSO             | THAPS       |                      |                     |
| Antigen Processing Machinery | Intracellular | LMP2             | 94.5 (180)  | 95.5 ( <b>303</b> )  |                     |
|                              |               | LMP7             | 75.8 (107)  | 81.2 ( <b>156</b> )  |                     |
|                              |               | LMP10            | 88.6 (108)  | 93.4 ( <b>191</b> )  |                     |
|                              |               | TAP1             | 91 (83)     | 92.6 ( <b>117</b> )  |                     |
|                              |               | TAP2             | 95.7 (143)  | 96.7 ( <b>223</b> )  |                     |
|                              |               | Calnexin         | 99 (260)    | 99.2 ( <b>456</b> )  |                     |
|                              |               | Calreticulin     | 90.8 (78)   | 88.8 ( <b>120</b> )  |                     |
|                              | Cell-Surface  | ←                | Tapasin     | 92.6 (96)            | 90.6 ( <b>168</b> ) |
|                              |               | HLA-A2           | 98.8 (954)  | 97 ( <b>1418</b> )   |                     |
|                              |               | ICAM-1           | 98.4 (1551) | 95.4 ( <b>2889</b> ) |                     |
|                              |               | CEA              | 9.4 (180)   | 11.8 (154)           |                     |
|                              |               | MUC-1            | 35.6 (51)   | 33.3 ( <b>179</b> )  |                     |

**Supplemental Table 1.** Tumor cells exposed to ER stress undergo immunogenic modulation. Human breast (MDA-MB-231) carcinoma cells were exposed to thapsigargin (0.2 uM/1h) or DMSO control. After 48 h, cells were analyzed by flow cytometry. Intracellular expression of indicated APM components and cell-surface expression of HLA-A2, ICAM-1, CEA, and MUC-1. Numbers indicate percentage of positive cells. Numbers in parentheses denote MFI. Bold denotes significant upregulation ( $\geq 30\%$  increase in percent of cells or MFI not observed in isotype control vs. untreated cells).
